1 **Mitochondria are physiologically maintained at close to 50 °C**

2 Dominique Chrétien<sup>1,2</sup>, Paule Bénit<sup>1,2</sup>, Hyung-Ho Ha<sup>3</sup>, Susanne Keipert<sup>4</sup>, Riyad El-Khoury<sup>5</sup>,  
3 Young-Tae Chang<sup>6</sup>, Martin Jastroch<sup>4</sup>, Howard T Jacobs<sup>7,8</sup>, Pierre Rustin<sup>1,2</sup>, Malgorzata Rak<sup>1,2</sup>

4

5 <sup>1</sup>INSERM UMR1141, Hôpital Robert Debré, 48, Boulevard Sérurier, 75019, Paris, France

6 <sup>2</sup>Université Paris 7, Faculté de Médecine Denis Diderot, Paris, France

7 <sup>3</sup>College of Pharmacy, Suncheon National University, Suncheon, 540-742 Republic of Korea

8 <sup>4</sup>Institute for Diabetes and Obesity, Helmholtz Centre Munich, German Research Center for  
9 Environmental Health, 85764 Neuherberg, Germany

10 <sup>5</sup>Neuromuscular Diagnostic Laboratory, Department of Pathology & Laboratory Medicine,  
11 American University of Beirut Medical Center, Beirut, Lebanon

12 <sup>6</sup>Department of Chemistry, POSTECH, Pohang, Gyeongbuk, 37673 Republic of Korea

13 <sup>7</sup>BioMediTech and Tampere University Hospital, FI-33014 University of Tampere, Finland

14 <sup>8</sup>Institute of Biotechnology, FI-00014 University of Helsinki, Finland

15

16

17

18

19

20

21

22

23 Correspondence to: Pierre Rustin, Inserm U1141, Hôpital Robert Debré, Bâtiment Bingen, 48,  
24 Boulevard Sérurier, 75019, Paris, France

25

26 email : [pierre.rustin@inserm.fr](mailto:pierre.rustin@inserm.fr) Tel : 00 (33) 1 40 03 19 89

27

28 **Abstract**

29 In endothermic species, heat released as a product of metabolism ensures stable internal  
30 temperature throughout the organism, despite varying environmental conditions.

31 Mitochondria are major actors in this thermogenic process. Part of the energy released by the  
32 oxidation of respiratory substrates drives ATP synthesis and metabolite transport, while a  
33 noticeable proportion is released as heat. Using a temperature-sensitive fluorescent probe  
34 targeted to mitochondria, we measured mitochondrial temperature *in situ* under different  
35 physiological conditions. At a constant external temperature of 38 °C, mitochondria were  
36 more than 10 °C warmer when the respiratory chain was fully functional, both in  
37 HEK293cells and primary skin fibroblasts. This differential was abolished in cells lacking  
38 mitochondrial DNA or by respiratory inhibitors, but preserved or enhanced by expressing  
39 thermogenic enzymes such as the alternative oxidase or the uncoupling protein 1. The activity  
40 of various RC enzymes was maximal at, or slightly above, 50 °C. Our study prompts a re-  
41 examination of the literature on mitochondria, taking account of the inferred high  
42 temperature.

43

44

45

46

47

48

49

50

51

52

## 53 **Introduction**

54

55 As the main bioenergetically active organelles of non-photosynthetic eukaryotes,  
56 mitochondria convert part of the free energy released by the oxidation of nutrient molecules  
57 into ATP and other useful forms of energy needed by cells. However, this energy conversion  
58 process is far from being 100% efficient and significant fraction of the released energy is  
59 dissipated as heat. This raises the hitherto unexplored question of the effect of this heat  
60 production on the temperature of mitochondria and other cellular components.

61

62 To address this issue, we made use of the recently developed, temperature-sensitive  
63 fluorescent probe (Fig. S1A), MitoThermo Yellow (MTY) [1]. Because molecule  
64 fluorescence is known to be quite sensitive to a number of factors and as MTY is derived  
65 from the membrane potential-sensitive dye rhodamine, in this study we investigated whether  
66 the observed changes in MTY fluorescence we observed in HEK293 cells (human embryonic  
67 kidney cells 293) could be influenced by altered membrane potential, or by associated  
68 parameters, such as pH, ionic gradients or altered mitochondrial morphology. As a major  
69 conclusion of this study, we found that the rise in mitochondrial temperature due to full  
70 activation of respiration is as high as  $\sim 10$  °C (n=10, range 7-12 °C; compared to 38°C  
71 temperature of cell suspension medium). We also showed that respiratory chain activities  
72 measured in intact mitochondria are up to 300% increased when assayed at the mitochondrial  
73 temperature measurable in intact cells.

74

## 75 **Results**

76

77 We first confirmed targeting to mitochondria in both HEK293 cells and primary skin  
78 fibroblasts, based on co-localization with the well-characterized dye MitoTracker Green  
79 (MTG; Fig. 1A). It was previously shown that the initial mitochondrial capture of MTY was  
80 dependent on the maintenance of a minimal membrane potential [1]. The exact sub-  
81 mitochondrial location of the probe is yet to be established, although it has been postulated to  
82 reside at the matrix side of the inner membrane [1]. MTY fluorescence from mitochondria  
83 was retained over 45 min, regardless of the presence of respiratory chain inhibitors, whilst full  
84 depolarization with an uncoupler led to MTY leakage from mitochondria after only 2 min  
85 (Fig. S3). Fluorescence remained stable over 2 hours in HEK293 cells, although the degree of  
86 mitochondrial MTY retention varied between cell lines, with probe aggregation observed in  
87 the cytosol in some specific lines (Fig. S3A). In HEK293 cells, which were selected for  
88 further study, we observed no toxicity of MTY (100 nM in culture medium) over 2 days (Fig.  
89 S5).

90  
91 We initially calibrated the response of MTY to temperature in solution. Its fluorescence at 562  
92 nm (essentially unchanged by the pH of the solution buffer in the range 7.2 to 9.5; Fig. S2),  
93 decreased in a reversible and nearly linear fashion: a temperature rise from 34 to 60 °C  
94 decreased fluorescence by about 50%, whilst 82% of the response to a 3 °C shift at 38 °C was  
95 preserved at 50 °C (Fig. 1B, a, b). Using a thermostated, magnetically stirred, closable 750 µl  
96 quartz-cuvette fitted with an oxygen sensitive optode device [2] we simultaneously studied  
97 oxygen consumption (or tension) and changes in MTY fluorescence (Fig. 1C). Adherent cells  
98 were loaded for 20 min with 100 nM MTY, harvested and washed, then kept as a  
99 concentrated pellet at 38 °C for 10 min, reaching anaerobiosis in < 1 min. When cells were  
100 added to the oxygen-rich medium they immediately started to consume oxygen (red trace;  
101 Fig. 1C), accompanied by a progressive decrease of MTY fluorescence (blue trace; phase I;

102 Fig. 1C). In the absence of any inhibitor, the fluorescence gradually reached a stable  
103 minimum (phase II). At that point, either due to a high temperature differential between the  
104 mitochondria and the surrounding cytosol (~ 10°C) and/or changes in membrane permeability  
105 leading to decreased thermal insulation, the temperature of the probe-concentrating  
106 compartment appeared to reach equilibrium. We computed the energy released as heat by the  
107 respiratory chain in this experiment as 1.05-1.35 mcal/min, based on the measured rate of  
108 oxygen consumption ( $11.3 \pm 1.8$  nmol/min/mg prot), and assuming that heat accounts for the  
109 difference between the 52.6 kcal/mol released by the full oxidation of NADH and the 21  
110 kcal/mol conserved as ATP under a condition of maximal ATP synthesis of 3 molecules per  
111 molecule of NADH oxidized. This should be sufficient to ensure the observed thermal  
112 equilibrium (~50°C after 20 min) (See Appendix in Supplemental data). Once all the oxygen  
113 in the cuvette was exhausted (red trace) the directional shift of MTY fluorescence reversed  
114 (phase III), returning gradually almost to the starting value (phase IV). To calibrate the  
115 fluorescence signal *in vivo*, the temperature of the extra-cellular medium was increased  
116 stepwise (green trace). MTY fluorescence returned to the prior value when the medium was  
117 cooled again to 38 °C (Fig. 1C, phase V). This *in vivo* calibration was consistent with the  
118 response of MTY fluorescence in solution up to 44 °C, although further direct calibration  
119 steps *in vivo* are not possible without compromising cell viability. However, we confirmed  
120 that the response of MTY fluorescence to increased temperature deviates slightly from  
121 linearity *in vivo* in the same manner as in aqueous solution, namely that at maximal  
122 mitochondrial warming, extrapolated as being close to 50°C, the response to a 2 °C  
123 temperature shift is approximately 80% of that at 38 °C (Fig. S6). We therefore estimate the  
124 rise in mitochondrial temperature due to full activation of respiration as ~10 °C (n=10, range  
125 7-12 °C).

126

127 At the lowest (phase II) and highest fluorescence values (38°C, imposed by the water bath;  
128 phase IV), the signal was proportional to the amount of added cells, in a given experiment  
129 (Fig. 1D, a). Cell number did not affect the maximal rate of fluorescence decrease (computed  
130 from phase I). However, once anaerobic conditions had been reached, the initial rate of  
131 fluorescence increase (phase III, initial) was inversely related to the number of cells (Fig. 1D,  
132 b). To confirm that the observed fluorescence changes were due to mitochondrial respiration  
133 and not some other cellular process, we depleted HEK293 cells of their mtDNA with ethidium  
134 bromide (EtBr) to a point where cytochrome *c* oxidase activity was less than 2% of that in  
135 control cells (Fig. 1E, a, S1C). In EtBr-treated cells, no MTY fluorescence changes were  
136 observed under aerobiosis and cyanide treatment had no effect (Fig. 1E, b). Because MTY is  
137 derived from the membrane potential-sensitive dye rhodamine, whose fluorescence is  
138 essentially unaffected by temperature (Figure 1B, b), we investigated whether the observed  
139 changes in MTY fluorescence could be influenced by altered membrane potential, or by  
140 associated parameters. We took advantage of the fact that cyanide or oligomycin exert  
141 opposite effects on membrane potential (Fig. 2C, S1D) and compared the response of MTY  
142 fluorescence to these inhibitors (Fig. 2A,B). To avoid the possibly confounding effect of  
143 anaerobiosis, the quartz cuvette was kept uncapped in this experiment, with the oxygen  
144 tension rather than the rates of oxygen uptake being recorded (red traces). Once MTY  
145 fluorescence was stabilized (maximal mitochondrial heating), and the medium re-oxygenated,  
146 cyanide was added, causing a progressive increase in MTY fluorescence to the starting value  
147 (Fig. 2A). Note that, when cyanide was initially present, fluorescence changes and oxygen  
148 uptake were both abolished (Fig. 2A, dotted lines). Adding oligomycin in lieu of cyanide also  
149 decreased oxygen consumption and, as observed with cyanide, brought about a similar  
150 increase in MTY fluorescence (Fig. 2B). If added first, oligomycin progressively decreased  
151 oxygen uptake, abolishing the decrease in MTY fluorescence in parallel (Fig. 2B, dotted

152 lines). Taken together, these experiments imply that electron flow through the respiratory  
153 chain (RC) rather than membrane potential or any related factor controls mitochondrial  
154 temperature. This conclusion is supported by examining the respective kinetics of membrane  
155 potential changes (tens of seconds) and MTY fluorescence changes (tens of minutes).

156

157 A quite similar effect was observed with two other respiratory inhibitors (Fig. S1D), affecting  
158 this time either RC complex I (CI; rotenone, Fig. 2D, S1D) or III (CIII; antimycin, Fig. 2E,  
159 S1D). Despite their different effects on the redox state of the various RC electron carriers,  
160 these inhibitors blocked oxygen uptake and again triggered an increase in MTY fluorescence.  
161 Importantly, these two inhibitors (and oligomycin) have been shown to trigger increased  
162 production of superoxide by the respiratory chain [3], but their effects on MTY fluorescence  
163 are similarly determined by oxygen consumption as for cyanide inhibition, which decreases  
164 superoxide production at complex III. This rules out any interference from superoxide in the  
165 observed MTY fluorescence changes. Taking advantage of cyanide removal from cytochrome  
166 *c* oxidase to form cyanohydrin in the presence of  $\alpha$ -ketoacids under aerobiosis [4], we  
167 confirmed that the blockade of the respiratory chain did not result in MTY leakage from the  
168 mitochondria since pyruvate addition resulted in oxygen uptake resuming and MTY  
169 fluorescence decrease, both being inhibited by a further addition of antimycin (Fig. 2F).  
170 Leakage of the probe from mitochondria of other cell lines was reflected in a decreased ability  
171 of cyanide to restore MTY fluorescence to its initial value (Fig. S4C).

172

173 Note that changes in MTY fluorescence cannot be attributed to altered mitochondrial  
174 morphology, since 45 min of MTY treatment had no detectable effect on the mitochondrial  
175 network (Fig. S3i,j), nor did any of the inhibitors used in the above experiments (Fig. S3a-f).  
176 Importantly, the fluorescence of an endoplasmic reticulum (ER)-targeted version of the probe

177 in HEK293 cells and skin fibroblasts was essentially unaffected by the activity of the  
178 mitochondria when modulated by cyanide, pyruvate or antimycin (Fig. S7).

179

180 We next studied MTY probe behavior in HEK293 cells in which CI was inhibited by the  
181 addition of varying amounts of rotenone (Fig. 3A). The rate of change of MTY fluorescence  
182 was proportional to the residual respiratory electron flux whilst the maximal temperature, as  
183 judged by MTY fluorescence at equilibrium (phase II) was essentially unchanged (Fig. 3A;  
184 inset). We next tested the effect of expressing the cyanide-insensitive non-proton motive  
185 alternative oxidase from *Ciona intestinalis* (AOX; Fig. 3B, S1E), whose activity is unmasked  
186 in the presence of cyanide [5]. Before cyanide addition, the decrease in MTY fluorescence in  
187 AOX-expressing cells was similar to control cells, consistent with previous inferences that the  
188 enzyme does not significantly participate in uninhibited cell respiration [6]. However upon  
189 cyanide addition, AOX-endowed cells maintained low MTY fluorescence (Fig. 3B, blue  
190 trace), despite oxygen consumption decreasing by more than 50% (red trace). The increased  
191 ratio of heat generated to respiration is consistent with the predicted thermogenic properties of  
192 AOX. Subsequent addition of 0.1 mM propylgallate, which inhibits AOX, almost completely  
193 abolished the residual respiration and brought MTY fluorescence back to its starting value  
194 (corresponding to 38°C).

195

196 So as to circumvent the fact that we were not able to use chemical uncouplers with this probe  
197 [1], we used HEK293 cells engineered to express the uncoupling protein 1 (UCP1; Fig. 3C,  
198 S1F). As expected, UCP1 conferred an increased rate of respiration, which was only partially  
199 inhibited by oligomycin (red trace), and accompanied by an even greater drop in MTY  
200 fluorescence, equivalent to a temperature of about 12 °C above the cellular environment.  
201 HEK293 cells endowed with UCP1 also exhibited a faster rate of decrease of MTY



202 fluorescence compared with control HEK293 cells, about two fold during the first 5 min (Fig.  
203 3D).

204

205 The surprisingly high inferred mitochondrial temperatures prompted us to check the  
206 dependence on assay medium temperature of RC enzyme activities measured under  $V_{\max}$   
207 conditions in crude extracts, where mitochondrial membrane integrity is maintained (Fig. 4A,  
208 B). Antimycin-sensitive CIII, malonate-sensitive succinate cytochrome *c* reductase (CII+CIII)  
209 and cyanide-sensitive cytochrome *c* oxidase (CIV) activities all showed temperature optima at  
210 or slightly above 50 °C, whilst these activities tended gradually to decrease as the  
211 temperatures were raised further (Fig. 4A). This was not so for those enzymes whose  
212 activities can be measured *in vitro* only after osmotic disruption of both outer and inner  
213 mitochondrial membranes (Fig. 4B). Oligomycin-sensitive ATPase (CV) activity was optimal  
214 around 46 °C, whereas rotenone-sensitive NADH quinone-reductase (CI) activity declined  
215 sharply at temperatures above 38 °C. Interestingly after treatment at temperatures above 46 °C  
216 and 42 °C under conditions used for CI assay, the activities of CIV and CII of mitochondria  
217 were impaired as well, as revealed by native electrophoresis and in-gel activity (Fig. 4C). This  
218 strongly suggests a vital role for the inner mitochondrial membrane structure in the  
219 stabilization of the RC complexes at high temperature. We next analyzed the temperature  
220 profile of RC activity of primary skin fibroblasts. For CII+CIII, CIII and CIV (Fig. 4D), as  
221 well as CV (Fig. 4E) similar temperature optima were observed as in HEK293 cells, whilst  
222 MTY fluorescence (Fig. 4F) also indicated mitochondria being maintained at least 6-10 °C  
223 above environmental temperature.

224

225 **Discussion**

226 Our findings raise numerous questions concerning the biochemistry, physiology and  
227 pathology of mitochondria. The physical, chemical and electrical properties of the inner  
228 mitochondrial membrane and of mitochondria in general, will need to be re-evaluated, given  
229 that almost all previous literature reflects experiments conducted far from our inferred  
230 physiological temperature. Traditional views of the lipid component of the respiratory  
231 membrane as a lake in which the RC complexes are floating resulting in a random-diffusion  
232 model of electron transfer or, more recently, as a sealant occupying the space between tightly  
233 packed proteins [7], need to be revised in favour of one that considers it more as a glue that  
234 maintains the integrity of the respiratory complexes.

235

236 A few years ago an intense debate took place on the actual possibility of maintaining  
237 temperature gradients in isolated cells considering the quite tiny volumes involved  
238 [8,9,10,11,12]. Largely based on theoretical consideration, it was suggested that additional  
239 factors must account for the large changes observed using thermosensitive-fluorescent probes  
240 [11]. For mitochondria, these potential factors include membrane potential changes (and  
241 related changes in pH, ionic gradients and matrix morphology), altered mitochondrial  
242 superoxide production, changes in probe conformation (especially for fluorescent protein  
243 probes) or probe leakage from mitochondria. Our study however suggests that none of these  
244 factors significantly influences MTY fluorescence under our experimental conditions.

245

246 On the other hand, the many unknowns regarding micro- and nano-scale physical parameters  
247 [12], render purely theoretical considerations questionable, in particular when considering the  
248 complex and dynamic structure of mitochondria. Most models have assumed mitochondria to  
249 be tiny, undifferentiated spheres, floating in an aqueous medium, the cytosol. This  
250 oversimplification would preclude significant temperature differences between mitochondria

251 and the cytosol. However, mitochondria *in vivo* typically form a filamentous network, with  
252 considerable internal structure. Assuming MTY to be localized to the inner face of the inner  
253 membrane, or the adjacent pockets of matrix, the heated compartments would be juxtaposed  
254 to each other rather than to the colder cytosol. Moreover, compaction of the cytosol in  
255 domains rich in mitochondria, as observed in HEK293 cells, would also limit heat conduction  
256 out into the rest of the cell.

257

258 Lastly, the molecular heterogeneity of the various sub-mitochondrial compartments must be  
259 considered. The inner membrane is very rich in proteins (protein-to-lipid ratio 80:20,  
260 compared to 50:50 for the outer membrane), including those that are sources of heat, and has  
261 a distinct lipid composition including cardiolipins. The intermembrane space and the  
262 phospholipid-rich outer membrane might provide additional sources of insulation, with many  
263 relevant parameters unknown, including heat-conductance and geometry of the various  
264 compartments. Similar considerations may apply to hyperthermophile bacteria. These, in  
265 addition to thermal resistance of numerous compounds [13], have complex envelopes which  
266 have to act as insulators from extreme external environment as to maintain life-dependent  
267 membrane electrochemical gradients [14].

268

269 A 6 to 9 °C temperature shift between mitochondria and the surrounding cytosol, induced by  
270 the addition of an uncoupler (10 μM carbonyl cyanide-4-(trifluoromethoxy)  
271 phenylhydrazone), was recently reported in HeLa cells [15], using a genetically encoded,  
272 GFP-derived ratiometric fluorescent probe. Although carried under quite different conditions  
273 (confocal microscopy of a single cell), and without determining mitochondrial activity under  
274 these conditions, the data are consistent with our own findings.

275

276 Following our observations, the effects of respiratory dysfunction need to be reconsidered, to  
277 include those attributable to temperature changes, such as effects on membrane fluidity,  
278 electrical conductance and transport. RC organization into supercomplexes [16,17] should be  
279 re-examined at more realistic temperatures using methods other than CNE. Finally, whilst the  
280 subcellular distribution of mitochondria (e.g. perinuclear, or synaptic) has previously been  
281 considered to reflect ATP demand, mitochondria should also be considered as a source of  
282 heat, potentially relevant in specific cellular or physiological contexts, not just in specifically  
283 thermogenic tissues like brown fat. Furthermore, temperature differences should be  
284 considered as an additional possible dimension to the intracellular functional heterogeneity of  
285 mitochondria.

286

## 287 **Materials and Methods**

288

### 289 **Cell culture**

290 Human cells derived from Embryonic Kidney (HEK293), Hepatoma Tissue Culture (HTC-  
291 116) and from large cell lung cancer (NCI-H460) cells (American Type Culture Collection,  
292 Manassas, VA 20108 USA) were cultured in DMEM medium containing 5 g/l glucose  
293 supplemented by 2 mM glutamine (as Glutamax™), 10% foetal calf serum, 1 mM pyruvate,  
294 100 µg/ml penicillin/streptomycin each. AOX-[18] or UCP-endowed [19,20]. The Trypan  
295 blue exclusion test was used to determine the number of viable and dead HEK cells [21].

296 Primary skin fibroblasts were derived from healthy individuals and grown under standard  
297 condition in DMEM glucose (4.5 g/l), 6 mM glutamine, 10% FCS, 200 µM uridine,  
298 penicillin/streptomycin (100 U/ml) plus 10 mM pyruvate.

299

### 300 **Immunoblot analyses and *in gel* enzyme activity assays**

301 For the Western blot analysis, mitochondrial proteins (50 µg) were separated by SDS–PAGE  
302 on a 12% polyacrylamide gel, transferred to a nitrocellulose membrane and probed overnight  
303 at 4°C with antibodies against the protein of interest, AOX 1:10,000 [22], UCP1 1:10,000  
304 [23]. Membranes were then washed in TBST and incubated with mouse or rabbit peroxidase-  
305 conjugated secondary antibodies for 2 h at room temperature. The antibody complexes were  
306 visualized with the Western Lightning Ultra Chemiluminescent substrate kit (Perkin Elmer).  
307 For the analysis of respiratory chain complexes, mitochondrial proteins (100 µg) were  
308 extracted with 6% digitonin and separated by hrCN-PAGE, on a 3.5–12% polyacrylamide gel.  
309 Gels were stained by in gel activity assay (IGA) detecting CI, CII and CIV activity as  
310 described [24].

311

### 312 **Staining procedures and life cell imaging**

313 Cells (HEK293, MTC, NIC, primary skin fibroblasts) were seeded on glass coverslips and  
314 grown inside wells of a 12 well-plate dish for 48 h in standard growth media at 37 °C, 5%  
315 CO<sub>2</sub>. The culture medium was replaced with pre-warmed medium containing fluorescent  
316 dyes, 100 nmol MitoTracker Green (Invitrogen M7514) and 100 nmol MitoThermo Yellow  
317 [1] or 100 nmol ER Thermo Yellow [25]. After 10 min the staining medium was replaced  
318 with fresh pre-warmed medium or PBS buffer and cells were observed immediately by Leica  
319 TCS SP8 confocal laser microscopy.

320

### 321 **Assay of mitochondrial respiratory chain activity**

322 The measurement of RC activities was carried out using a Cary 50 spectrophotometer (Varian  
323 Australia, Victoria, Australia), as described [26]. Protein was estimated using the Bradford  
324 assay.

325

326 **Simultaneous spectrofluorometric, temperature, oxygen uptake assay**

327 Detached sub-confluent HEK (NCI, HTS) cells (25 cm<sup>2</sup> flask) or trypsinized sub-confluent  
328 skin fibroblasts (75 cm<sup>2</sup> flask) were treated for 20 min with 100 µM MTY in 10 ml DMEM,  
329 and spun down (1,500 g x 5 min). The pellet is resuspended in 1 ml PBS, cells being next  
330 spun down (1,500 g x 5 min) and kept as a concentrated pellet. After anaerobiosis (checked  
331 by inserting an optic fiber equipped with an oxygen-sensitive fluorescent terminal sensor  
332 (Optode device; FireSting O<sub>2</sub>, Bionef, Paris, France) was established (10 min incubation of  
333 the pellet at 38°C;), cells (1 mg prot) were added to 750 µl of 38°C-thermostated medium.  
334 The fluorescence (excitation 542 nm, emission 562 nm for MTY; excitation 559 nm, emission  
335 581 nm for ERTY), the temperature of the medium in the cuvette and the respiration of the  
336 intact cell suspension were simultaneously measured in a magnetically-stirred, 38°C-  
337 thermostated 1 ml-quartz cell in 750 µl of PBS using the Xenius XC spectrofluorometer  
338 (SAFAS, Monaco). Oxygen uptake was measured with an optode device fitted to a handmade  
339 cap, ensuring either closing of the quartz-cell yet allowing micro-injections (hole with 0.6 mm  
340 diameter) or leaving the quartz-cell open to allow for constant oxygen replenishment.  
341 Alternatively, untreated HEK293 cells (250 µg protein) were added to 750 µl of medium  
342 consisting of 0.25 M sucrose, 15 mM KCl, 30 mM KH<sub>2</sub>PO<sub>4</sub> (pH 7.4), 5 mM MgCl<sub>2</sub>, EGTA 1  
343 mM, followed by addition of rhodamine to 100 nM and digitonin to 0.01 % w/v. The  
344 permeabilized cells were successively given a mitochondrial substrate (10 mM succinate) and  
345 ADP (0.1 mM) to ensure state 3 (phosphorylating) conditions, under which either 6.5 µM  
346 oligomycin or 1 mM cyanide was added.

347

348 **Statistics**

349 Data are presented as mean  $\pm$  SD statistical significance was calculated by standard unpaired  
350 one-way ANOVA with Bonferroni post-test correction; a  $p < 0.05$  was considered statistically  
351 significant (GraphPad Prism).

352

### 353 **Acknowledgements**

354 This work was supported by French (ANR FIFA2-12-BSV1-0010 and ANR MITOXDRUGS-  
355 DS0403 to DC, PB, MR and PR) and European (E-rare Genomit to DC, PB, MR and PR)  
356 institutions and patient's associations to PB and PR Association d'Aide aux Jeunes Infirmes  
357 (AAJI), Association contre les Maladies Mitochondriales (AMMi), Association Française  
358 contre l'Ataxie de Friedreich (AFAF), and Ouvrir Les Yeux (OLY).

359

360

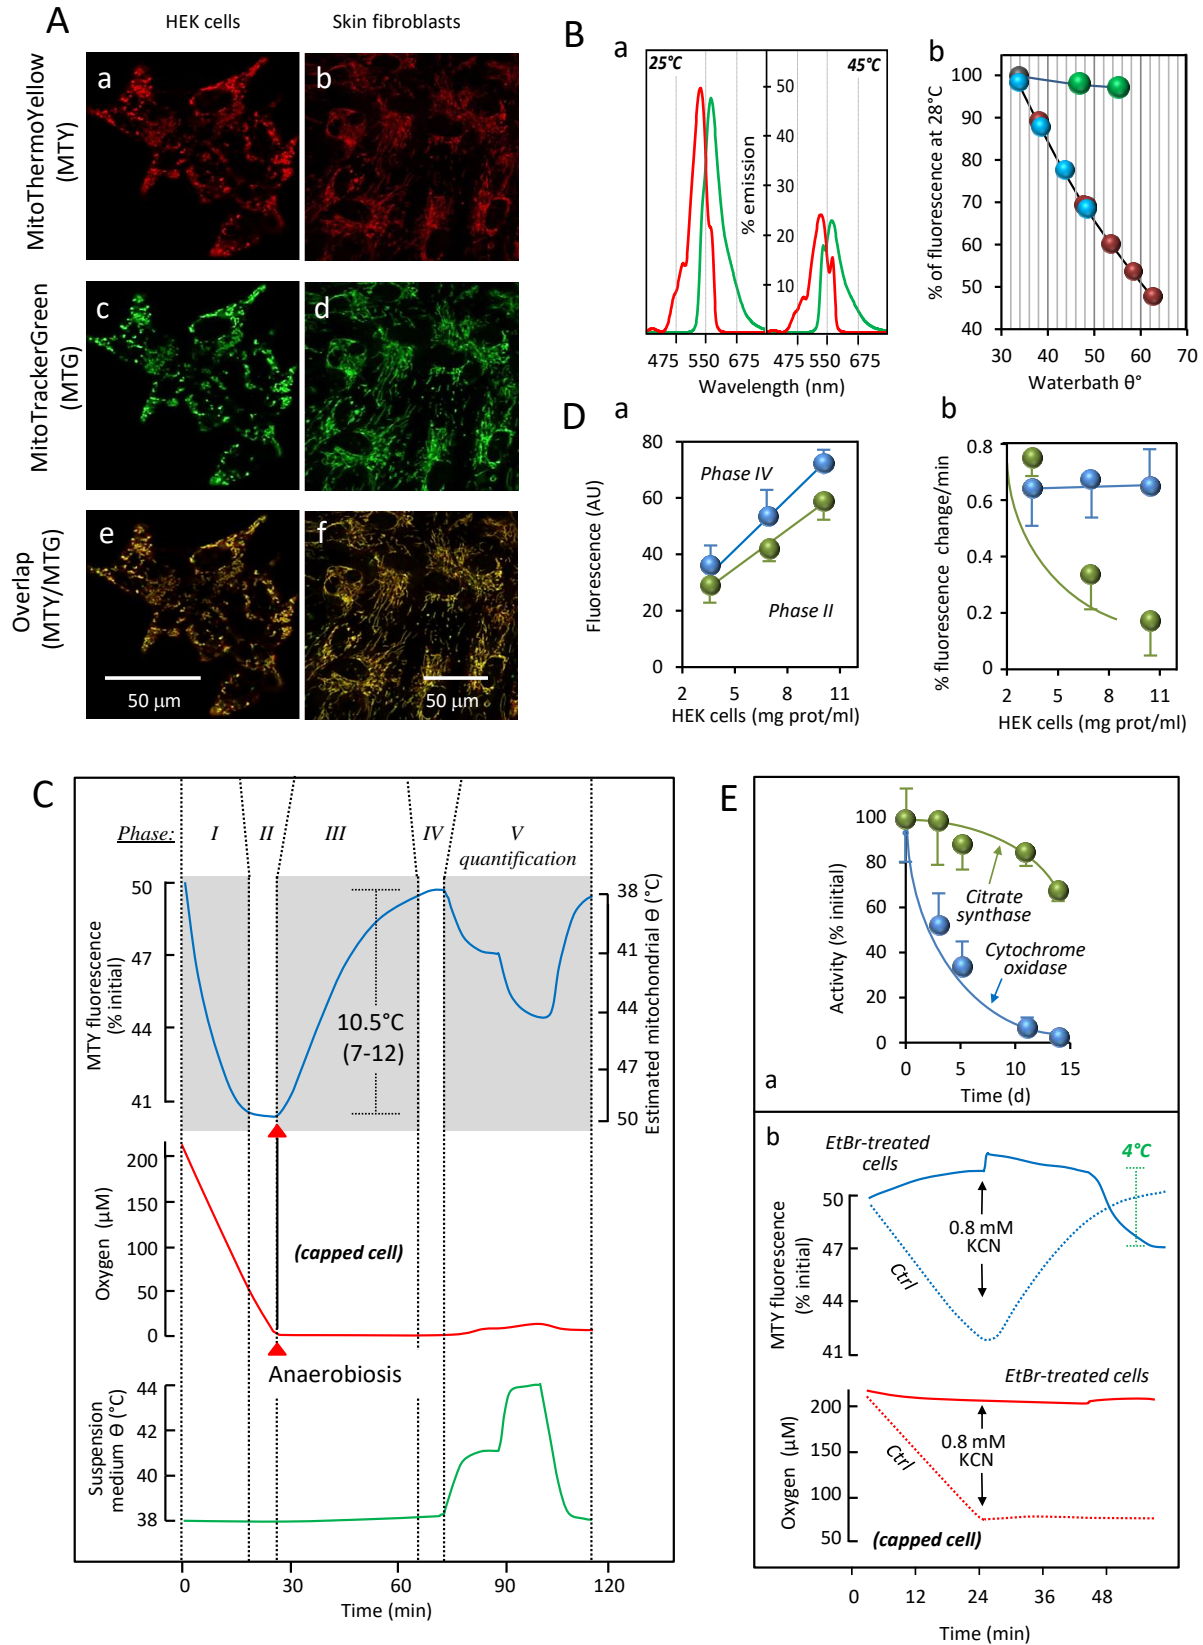

361

362 **Figure 1.** Determination of mitochondrial temperature in intact human cells.



363 A: The temperature-sensitive probe MitoThermo Yellow (MTY: a, b) co-localizes with  
364 MitoTracker Green (MTG: c, d, merge: e, f) in HEK293 cells and in primary skin fibroblasts,  
365 as indicated. B: a, Fluorescence excitation (red) and emission (green) spectra of MTY (1 mM)  
366 in 2 ml PBS at 25 and 45 °C; b, Response of MTY (blue and red) and rhodamine (green, also  
367 1 mM) fluorescence in 2 ml PBS to temperature (34 to 64 °C). Note that the pseudo-linear  
368 decrease of MTY fluorescence corresponding to increasing temperature (blue) is essentially  
369 reversed upon cooling (red) of the solution to the initial temperature. C, The definition of the  
370 various phases of fluorescence in MTY-preloaded HEK293 cell adopted in this study. Note  
371 that the initial value is given systematically as 50%, as set automatically by the  
372 spectrofluorometer, allowing either increases or decreases to be recorded. Phase I: cell  
373 respiration (red trace) after cells are exposed to aerobic conditions in PBS, resulting in  
374 decreased MTY fluorescence (blue trace) as mitochondria heat up; phase II: cell respiration  
375 under aerobic conditions, where a steady-state of MTY fluorescence has been reached  
376 (maximal warming of mitochondria). Cells were initially maintained for 10 min at 38 °C  
377 under anaerobic conditions, before being added to the cuvette; phase III: cell respiration that  
378 has arrested due to oxygen exhaustion - MTY fluorescence progressively increases to the  
379 starting value, as mitochondria cool down; phase IV: stalled respiration due to anaerobiosis;  
380 after reaching steady-state, MTY fluorescence is dictated only by the water-bath temperature;  
381 phase V, respiration stalled (anaerobiosis); temperature of the cell suspension medium (green  
382 trace) shifted by stepwise adjustments to water-bath temperature, followed by return to 38 °C.  
383 Measurements were carried out in a quartz chamber closed (capped cell) except for a 0.6 mm  
384 addition hole in the hand-made cap. The MTY fluorescence reached at the end of phase I was  
385 significantly different (n=10; \*\*\*) from the starting value of 50%, whilst the final value in  
386 phase IV was not. D, a, Linear increase of fluorescence of HEK293 cells (preloaded 10 min  
387 before trypsinization with 100 nM MTY) according to cell number (using cell protein

388 concentration as surrogate parameter); b, Maximal rate of decrease of MTY fluorescence (%,  
389 blue circles; corresponding with mitochondrial warming) is not significantly affected by cell  
390 number, whereas initial fluorescence increase in presence of cyanide (% , green circles,  
391 corresponding with initial rate of mitochondrial cooling) is modulated by cell number (values  
392 at the three cell concentrations tested were significantly different from each other). E: a,  
393 HEK293 cells were made severely deficient for cytochrome *c* oxidase by culture (10 days) in  
394 the presence of ethidium bromide (EtBr; 1 µg/ml). Cytochrome *c* oxidase activity (blue  
395 circles) declined to a few percent of the activity measured at t=0, whilst citrate synthase  
396 activity (green circles) was little changed; b, The fluorescence of EtBr-treated HEK293 cells  
397 (10 days of EtBr treatment) pre-loaded with MTY (blue continuous line) does not decrease  
398 following suspension in oxygenated medium, whilst that of control HEK293 cells (blue dotted  
399 lines) follows the profile documented in Fig. 1C; in contrast to control cells (red dotted line),  
400 EtBr-treated HEK293 cells also do not consume appreciable amounts of oxygen (red  
401 continuous line).  
402

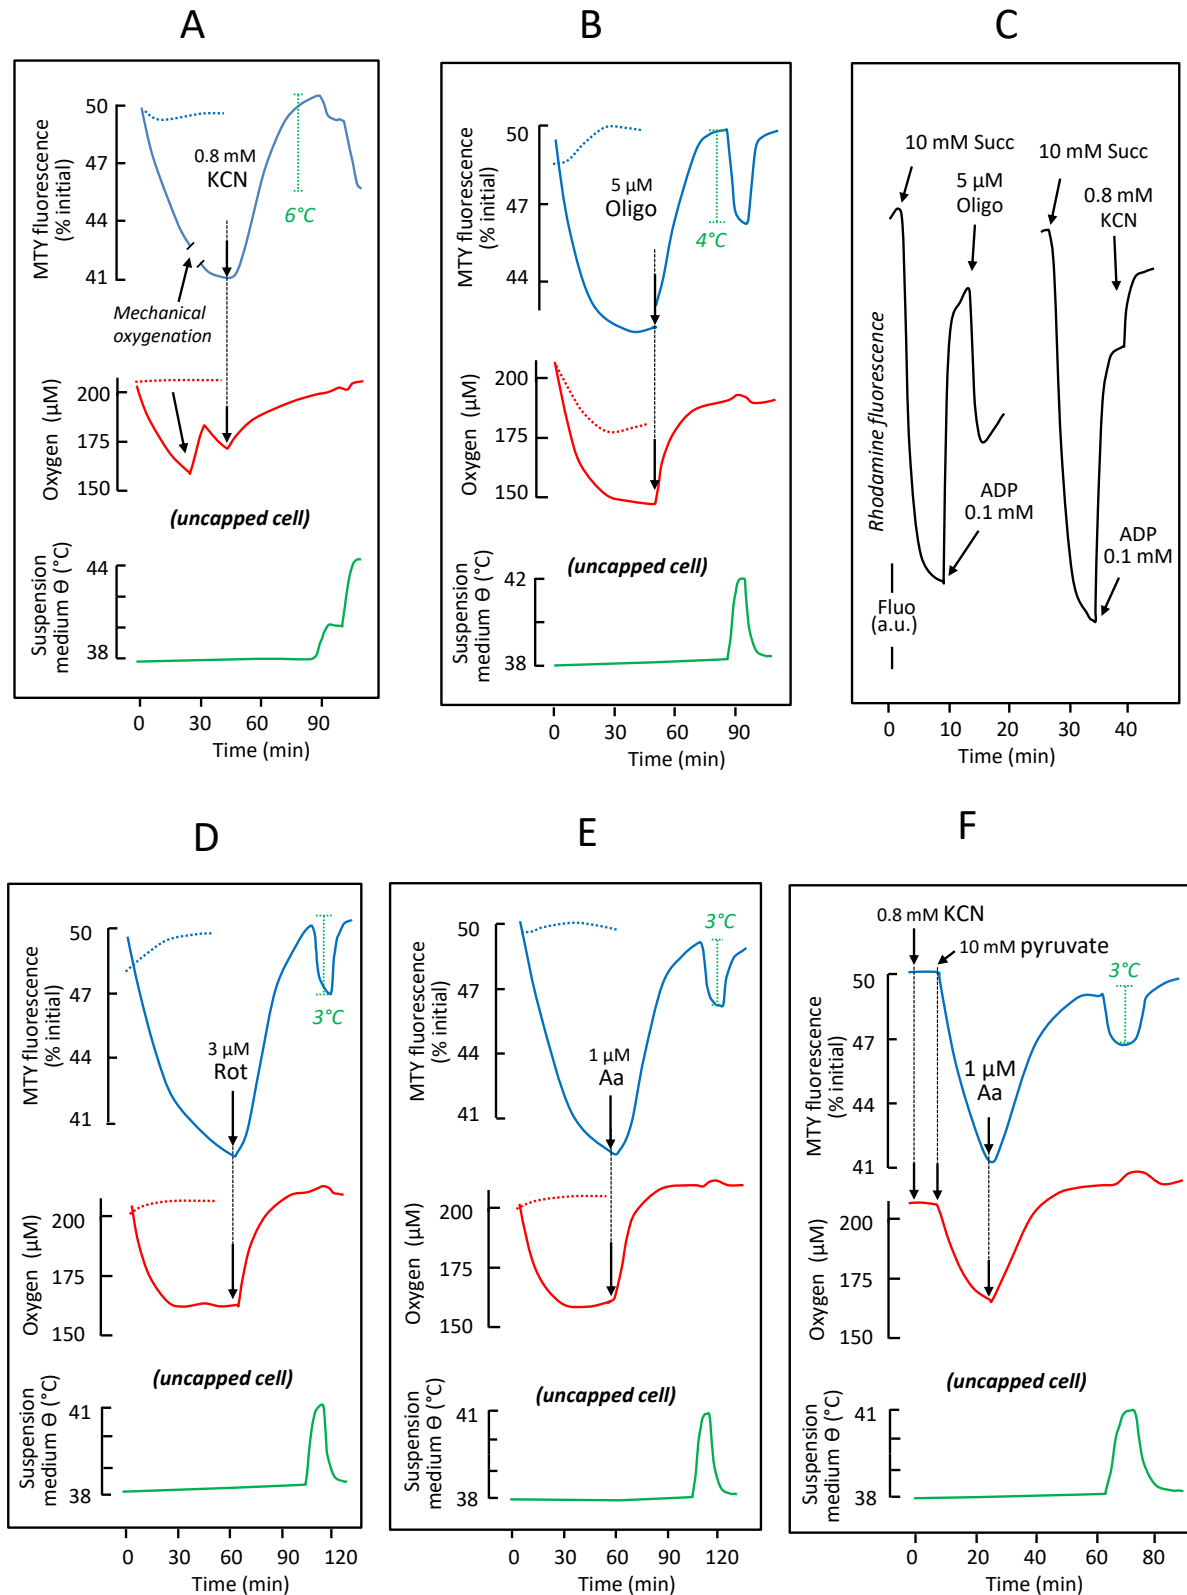

403

404 **Figure 2.** The rate of respiratory electron flow determines the temperature of mitochondria in

405 intact HEK293 cells.

406 A: The effect of 1 mM cyanide on MTY fluorescence (blue lines) and cell respiration (red  
407 lines), when added under aerobic conditions (continuous lines), or when present from the start  
408 of the experiment (dotted lines). Changes in the temperature of the cell suspension medium  
409 (green line), imposed by water bath adjustment, were used to calibrate the MTY fluorescence  
410 changes. B: The effect of 12.5  $\mu$ M oligomycin on MTY fluorescence (blue lines) and oxygen  
411 tension (affected by cell respiration balanced by medium stirring) in the uncapped quartz-  
412 cuvette (red lines), when added to freely respiring cells (continuous lines), or when present  
413 from the start of the experiment (dotted lines). C: The effects of different inhibitors on  
414 rhodamine fluorescence, in digitonin (0.001%)-permeabilized HEK293 cells supplied with 10  
415 mM succinate and 0.1 mM ADP as indicated. Under state 3 conditions 12.5  $\mu$ M oligomycin  
416 and 0.8 mM KCN have qualitatively opposite effects on rhodamine fluorescence, used as an  
417 indicator of membrane potential ( $\Delta\Psi$ ). The effects of 3  $\mu$ M rotenone (D) and 1  $\mu$ M antimycin  
418 (E) on MTY fluorescence and oxygen tension, plotted as for oligomycin in (B). F: The effect  
419 of adding pyruvate on MTY fluorescence (blue line) and oxygen uptake (red line) by KCN-  
420 inhibited HEK293 cells. Temperature calibration (green line) of MTY fluorescence as in A.  
421 Note that in all experiments in which MTY fluorescence was measured, the value reached at  
422 the end of phase I was in all cases significantly different ( $n \geq 5$ ; \*\*\*) from the starting value,  
423 whilst that in phase IV was not.

424

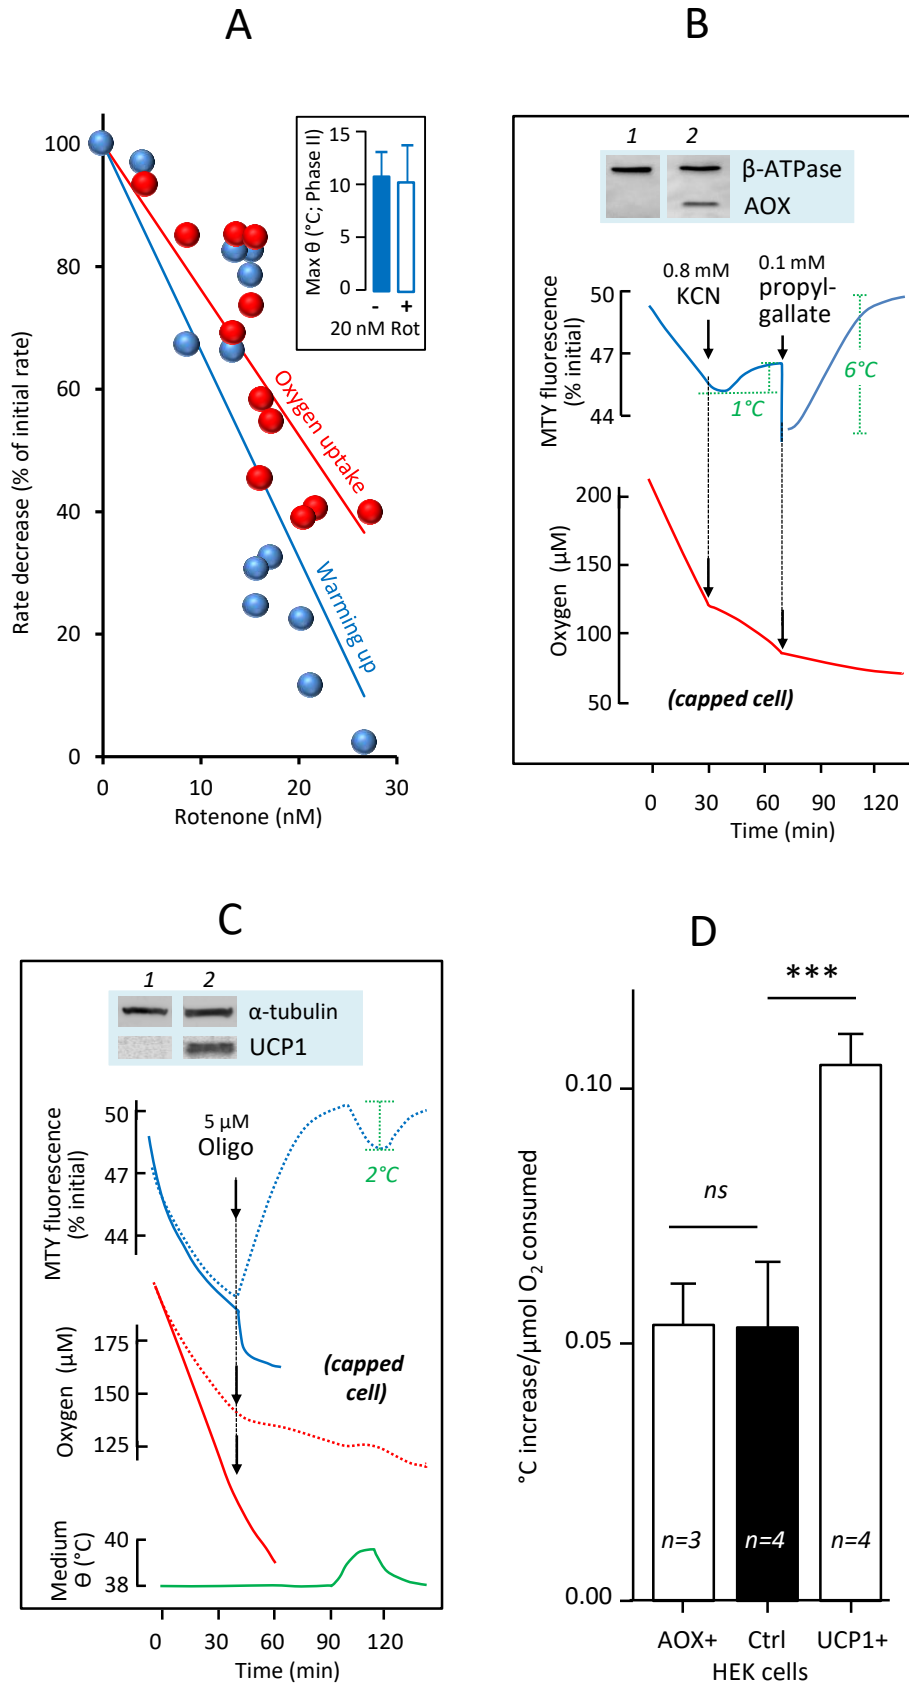

426 **Figure 3.** Effects on mitochondrial temperature of respiratory inhibitors, uncouplers and  
427 expression of heterologous mitochondrial proteins.  
428 A: Effect of variable rotenone addition to control HEK293 cells on the rates of oxygen uptake  
429 and fluorescence decrease of MTY. Rotenone was added at t=4 min; rates calculated from 4  
430 to 7 min and expressed as a percent of initial rate. Inset: Maximal warming of HEK293 cell  
431 mitochondria in the absence or presence of 20  $\mu$ M rotenone. B, C: Changes in MTY  
432 fluorescence (blue lines), cell respiration (B, C) (red lines) and temperature of cell suspension  
433 medium (green line), with additions of inhibitors as shown (KCN, n-propyl gallate) and/or  
434 oligomycin), alongside Western blots confirming expression or knockdown of the indicated  
435 genes: *C. intestinalis* alternate oxidase, AOX (B), UCP1 (C), alongside loading controls as  
436 indicated. Traces for control cells are shown by dotted lines. Note that in all experiments in  
437 which MTY fluorescence was measured, the value reached at the end of phase I was in all  
438 cases significantly different from the starting value, whilst that in phase IV was not (n=4;  
439 \*\*\*). (D), Computed from experiments using HEK293 cells endowed with AOX (AOX+),  
440 UCP1 (UCP1+) or control cells, initial increases of temperature ( $^{\circ}$ C) per  $\mu$ mol oxygen  
441 consumed were compared and statistically analyzed by a one way ANOVA and Bonferroni's  
442 multiple comparison test (n=3-4; means  $\pm$  SD).  
443

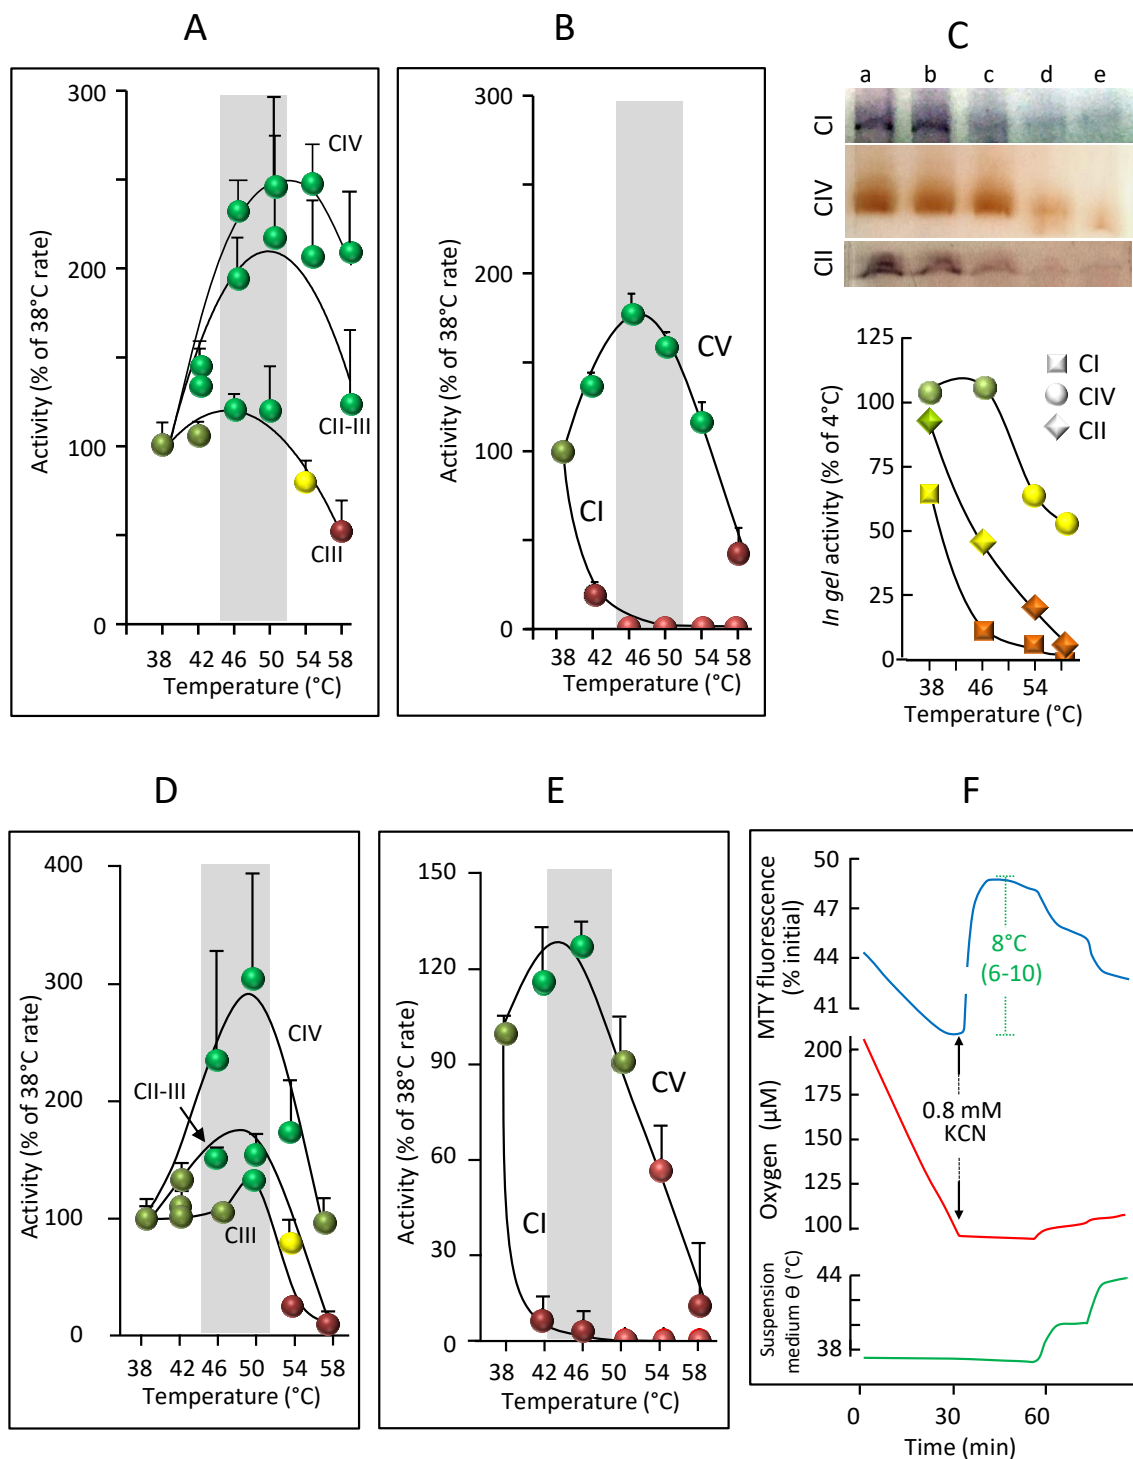

444

445 **Figure 4.** Effects of assay medium temperature on RC activities. A, D: Temperature profile of  
 446 cytochrome *c* oxidase (CIV), malonate-sensitive succinate:cytochrome *c* reductase (CII+III)  
 447 and antimycin-sensitive decylubiquinol:cytochrome *c* reductase (CIII) activity in (A) HEK293  
 448 cells, and (D) primary skin fibroblasts, after two freeze-thaw cycles, and (B, E) oligomycin-

449 sensitive ATPase (CV) and rotenone-sensitive NADH:decylubiquinone reductase (CI)  
450 activity, after disruption of inner mitochondrial membrane in frozen (B) HEK293 cells and  
451 (E) primary skin fibroblasts, by osmolysis with water [27]. Colours denote optimal (green),  
452 minimal (red) and degrees of intermediate (pale greens, yellow) activity. Grey bars indicate  
453 optimal temperature range. C: CNE in-gel activities of CI, CIV and CII extracted from  
454 mitochondria previously incubated for 10 min at (a) 4 °C , (b) 37°C, (c) 42 °C, (d) 46 °C and  
455 (e) 55 °C, also plotted graphically (lower panel). F: Changes in MTY fluorescence (blue),  
456 cell respiration (red) and temperature of cell suspension medium (green), for primary skin  
457 fibroblasts, as denoted in Fig. 2A, with addition of KCN as shown.

458

## 459 **References**

460

- 461 1. Arai S, Suzuki M, Park SJ, Yoo JS, Wang L, et al. (2015) Mitochondria-targeted  
462 fluorescent thermometer monitors intracellular temperature gradient. *Chem Commun*  
463 (Camb) 51: 8044-8047.
- 464 2. Benit P, Chretien D, Porceddu M, Yanicostas C, Rak M, et al. (2017) An Effective,  
465 Versatile, and Inexpensive Device for Oxygen Uptake Measurement. *J Clin Med* 6.
- 466 3. Boveris A (1977) Mitochondrial production of superoxide radical and hydrogen peroxide.  
467 *Adv Exp Med Biol* 78: 67-82.
- 468 4. Green DE, Williamson S (1937) Pyruvic and oxaloacetic cyanohydrins. *Biochem J* 31: 617-  
469 618.
- 470 5. Bahr JT, Bonner WD, Jr. (1973) Cyanide-insensitive respiration. II. Control of the alternate  
471 pathway. *J Biol Chem* 248: 3446-3450.



- 472 6. El-Khoury R, Dufour E, Rak M, Ramanantsoa N, Grandchamp N, et al. (2013) Alternative  
473 oxidase expression in the mouse enables bypassing cytochrome c oxidase blockade  
474 and limits mitochondrial ROS overproduction. *PLoS Genet* 9: e1003182.
- 475 7. Lenaz G, Baracca A, Barbero G, Bergamini C, Dalmonte ME, et al. (2010) Mitochondrial  
476 respiratory chain super-complex I-III in physiology and pathology. *Biochim Biophys*  
477 *Acta* 1797: 633-640.
- 478 8. Baffou G, Rigneault H, Marguet D, Jullien L (2014) A critique of methods for temperature  
479 imaging in single cells. *Nat Methods* 11: 899-901.
- 480 9. Sakaguchi R, Kiyonaka S, Mori Y (2015) Fluorescent sensors reveal subcellular thermal  
481 changes. *Curr Opin Biotechnol* 31: 57-64.
- 482 10. Kiyonaka S, Sakaguchi R, Hamachi I, Morii T, Yoshizaki T, et al. (2015) Validating  
483 subcellular thermal changes revealed by fluorescent thermosensors. *Nat Methods* 12:  
484 801-802.
- 485 11. Baffou G, Rigneault H, Marguet D, Jullien L (2015) Reply to: "Validating subcellular  
486 thermal changes revealed by fluorescent thermosensors" and "The 10(5) gap issue  
487 between calculation and measurement in single-cell thermometry". *Nat Methods* 12:  
488 803.
- 489 12. Suzuki M, Zeeb V, Arai S, Oyama K, Ishiwata S (2015) The 10(5) gap issue between  
490 calculation and measurement in single-cell thermometry. *Nat Methods* 12: 802-803.
- 491 13. Stetter KO (1999) Extremophiles and their adaptation to hot environments. *FEBS Lett*  
492 452: 22-25.
- 493 14. Oger PM, Cario A (2013) Adaptation of the membrane in Archaea. *Biophys Chem* 183:  
494 42-56.

- 495 15. Nakano M, Arai Y, Kotera I, Okabe K, Kamei Y, et al. (2017) Genetically encoded  
496 ratiometric fluorescent thermometer with wide range and rapid response. *PLoS One*  
497 12: e0172344.
- 498 16. Schagger H (2002) Respiratory chain supercomplexes of mitochondria and bacteria.  
499 *Biochim Biophys Acta* 1555: 154-159.
- 500 17. Wu M, Gu J, Guo R, Huang Y, Yang M (2016) Structure of Mammalian Respiratory  
501 Supercomplex I<sub>1</sub>III<sub>2</sub>IV<sub>1</sub>. *Cell* 167: 1598-1609 e1510.
- 502 18. El-Khoury R, Kaulio E, Lassila KA, Crowther DC, Jacobs HT, et al. (2016) Expression of  
503 the alternative oxidase mitigates beta-amyloid production and toxicity in model  
504 systems. *Free Radic Biol Med* 96: 57-66.
- 505 19. Oelkrug R, Goetze N, Exner C, Lee Y, Ganjam GK, et al. (2013) Brown fat in a  
506 protoendothermic mammal fuels eutherian evolution. *Nat Commun* 4: 2140.
- 507 20. Keipert S, Jastroch M (2014) Brite/beige fat and UCP1 - is it thermogenesis? *Biochim*  
508 *Biophys Acta* 1837: 1075-1082.
- 509 21. Strober W (2001) Trypan blue exclusion test of cell viability. *Curr Protoc Immunol*  
510 Appendix 3: Appendix 3B.
- 511 22. Hakkaart GA, Dassa EP, Jacobs HT, Rustin P (2006) Allotopic expression of a  
512 mitochondrial alternative oxidase confers cyanide resistance to human cell respiration.  
513 *EMBO Rep* 7: 341-345.
- 514 23. Jastroch M, Hirschberg V, Klingenspor M (2012) Functional characterization of UCP1 in  
515 mammalian HEK293 cells excludes mitochondrial uncoupling artefacts and reveals no  
516 contribution to basal proton leak. *Biochim Biophys Acta* 1817: 1660-1670.
- 517 24. Wittig I, Karas M, Schagger H (2007) High resolution clear native electrophoresis for in-  
518 gel functional assays and fluorescence studies of membrane protein complexes. *Mol*  
519 *Cell Proteomics* 6: 1215-1225.

- 520 25. Arai S, Lee SC, Zhai D, Suzuki M, Chang YT (2014) A molecular fluorescent probe for  
521 targeted visualization of temperature at the endoplasmic reticulum. *Sci Rep* 4: 6701.
- 522 26. Rustin P, Chretien D, Bourgeron T, Gerard B, Rotig A, et al. (1994) Biochemical and  
523 molecular investigations in respiratory chain deficiencies. *Clin Chim Acta* 228: 35-51.
- 524 27. Chretien D, Benit P, Chol M, Lebon S, Rotig A, et al. (2003) Assay of mitochondrial  
525 respiratory chain complex I in human lymphocytes and cultured skin fibroblasts.  
526 *Biochem Biophys Res Commun* 301: 222-224.
- 527
- 528
